# Supplementary material for: Eight immune-related genes predict survival outcomes and immune characteristics in breast cancer
Source: publisher site journal article supplement (doi:10.18632/aging.103753), 2020-08-03
Supplement: Supplementary file [file aging-v12i16-103753-supplementary-material-SD1.pdf]

**SUPPLEMENTARY FIGURES**

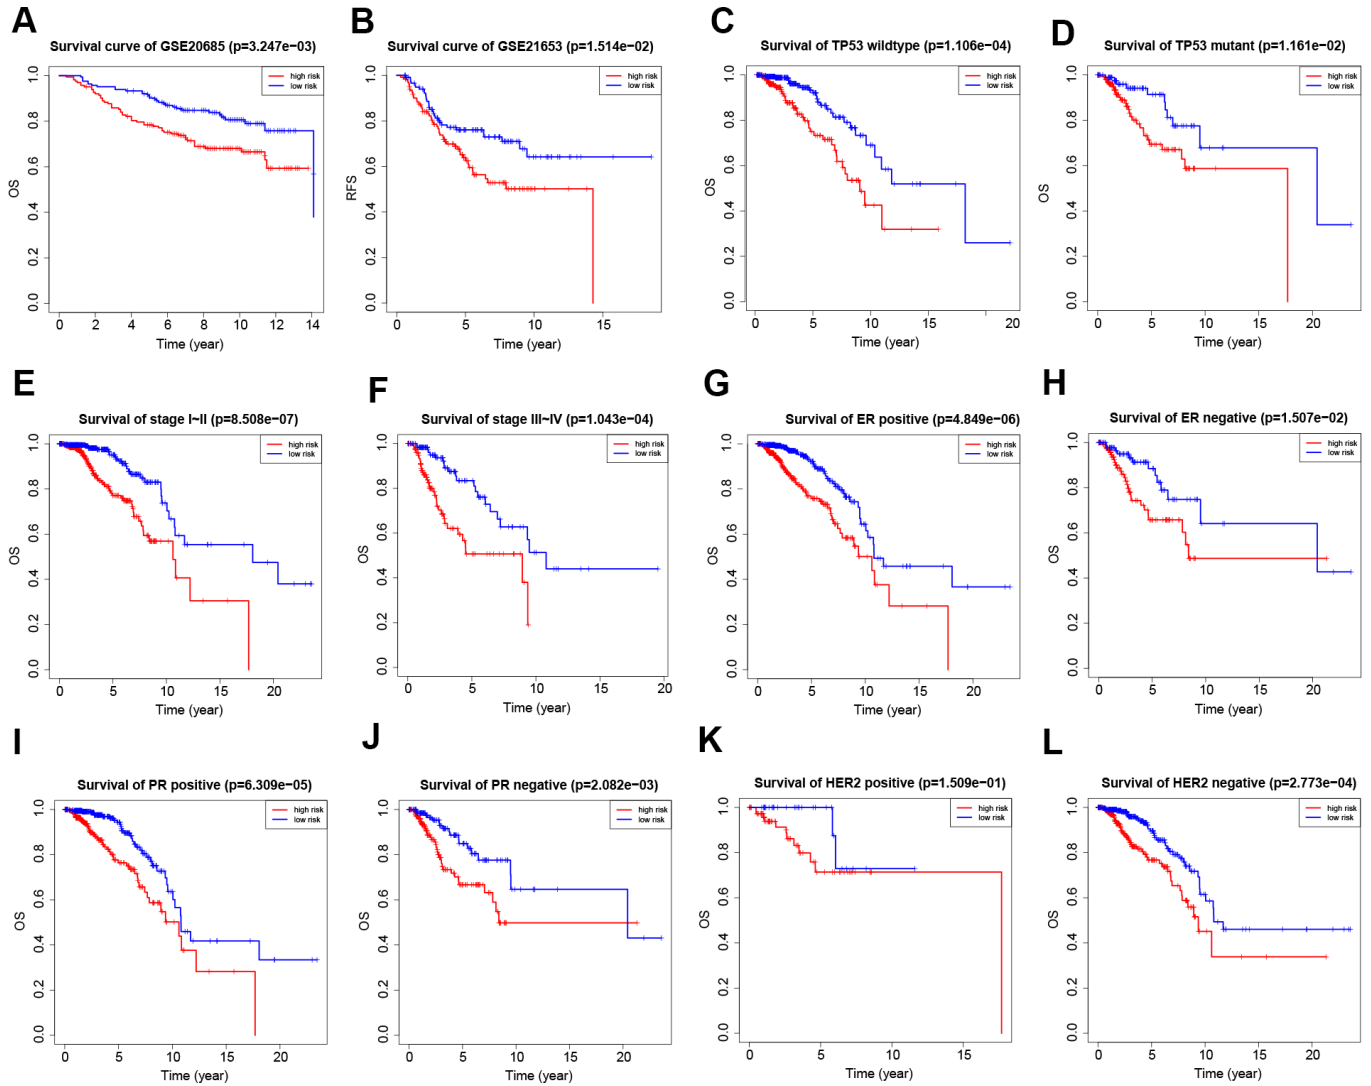

**Supplementary Figure 1. Validation of the eight-gene signature using survival analysis of GEO datasets and in different subtypes and stages of breast cancer.** (A, B) Survival analysis of the GSE20685 and GSE21653 GEO datasets. (C, D) Survival analysis of breast cancer patients depending on TP53 mutation status. (E, F) Survival analysis of stage I-II vs. stage III-IV breast cancer patients. (G–L) Survival analysis in breast cancer patients with the following subtypes: ER positive/negative, PR positive/negative, HER2 positive/negative.

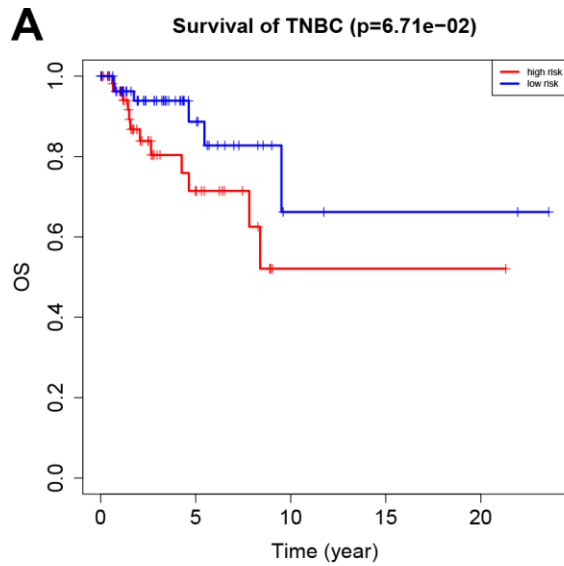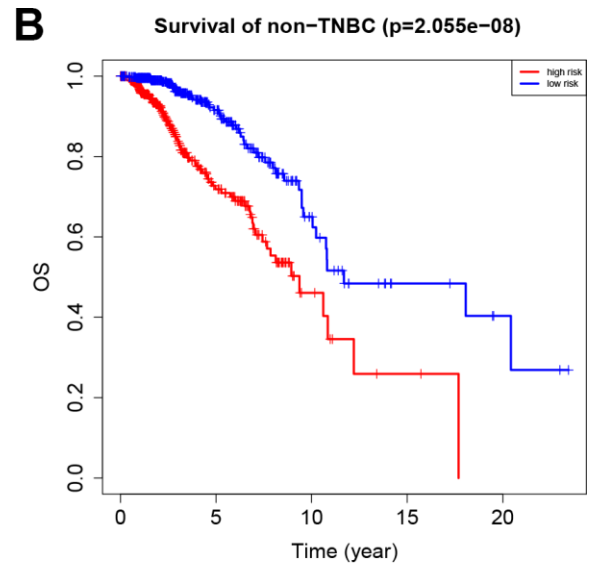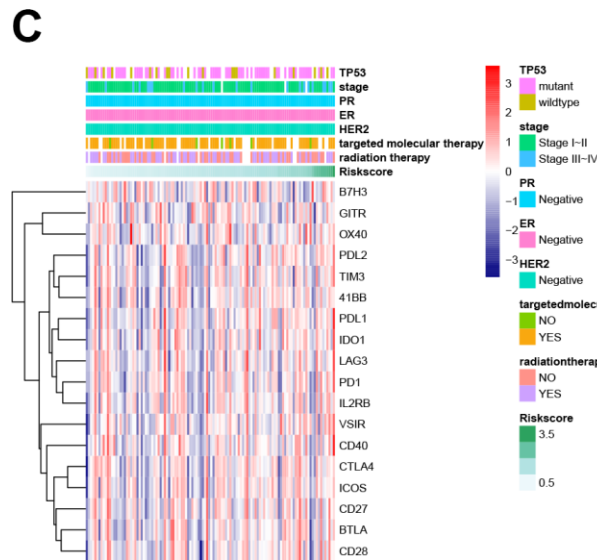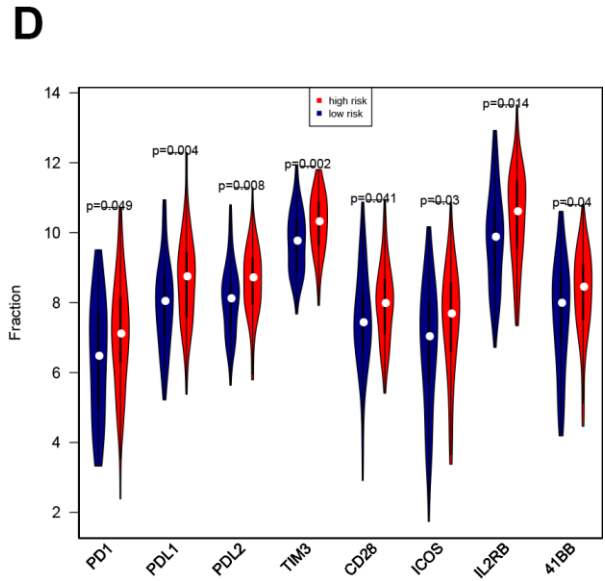

**Supplementary Figure 2. Predictive value of the eight-gene signature for survival outcomes and immune checkpoints in TNBC subgroup.** (A) Survival analysis of high- and low-risk TNBC patients. (B) Survival analysis of high- and low-risk non-TNBC patients. (C) Heatmap showing associations between risk score, clinical variables, and 18 immune checkpoints. (D) Predictive value of the eight-gene signature for PD1, PDL1, PDL2, TIM3, CD28, ICOS, IL2RB, and 41BB.
